# Supplementary material
Source: publisher figshare collection journal article supplement (https://frontiersin.figshare.com/ndownloader/files/23555018)

# Supplementary Material

## 1 SUPPLEMENTARY TABLES AND FIGURES

### 1.1 Figures

**Figure S1.** UMAP projections on the BRCA-subtypes task with 3-layer juxtaposed data. Each subplot represents the projection of the TR/TS/TS2 partition for the remaining 9 splits not reported in the main text. Circle: TR set; triangle: TS set; diamond: TS2 set.

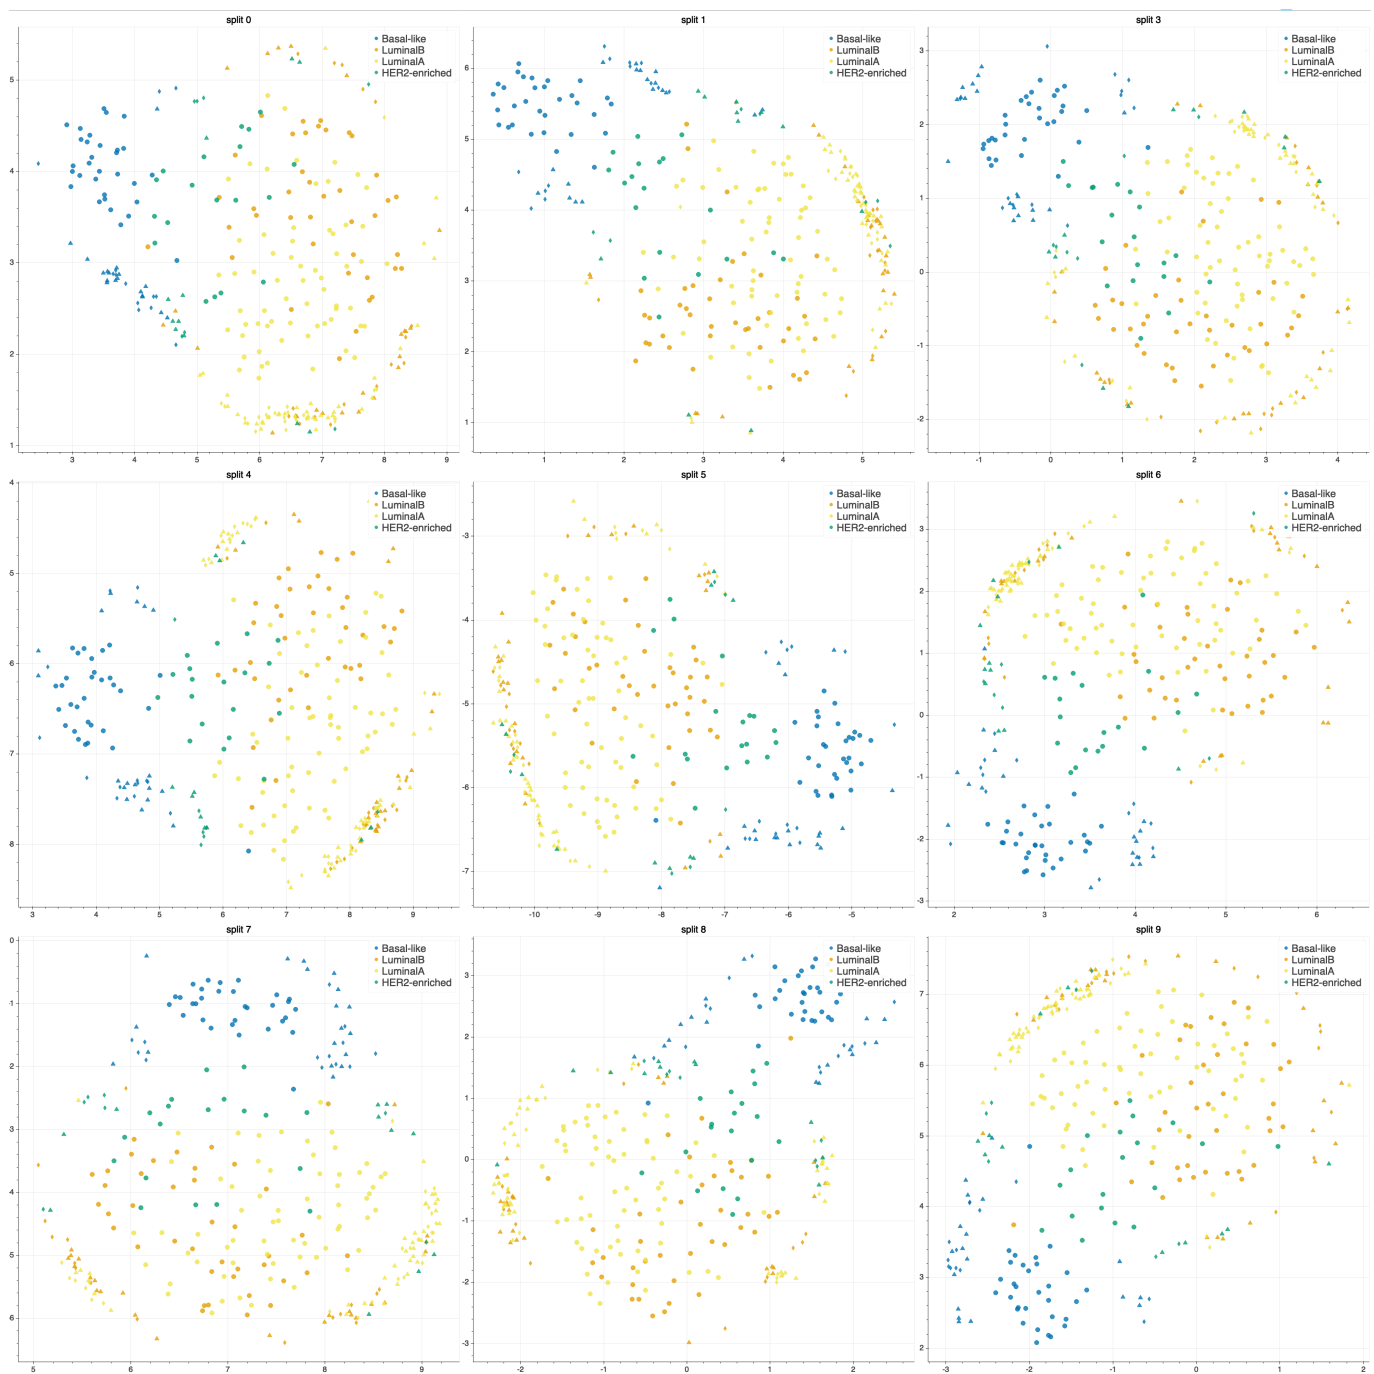

**Figure S2.** UMAP projections on the BRCA-subtypes task with 3-layer juxtaposed data restricted to the INF signature. Each subplot represents the projection of the TR/TS/TS2 partition for the remaining 9 splits not reported in the main text. Circle: TR set; triangle: TS set; diamond: TS2 set.

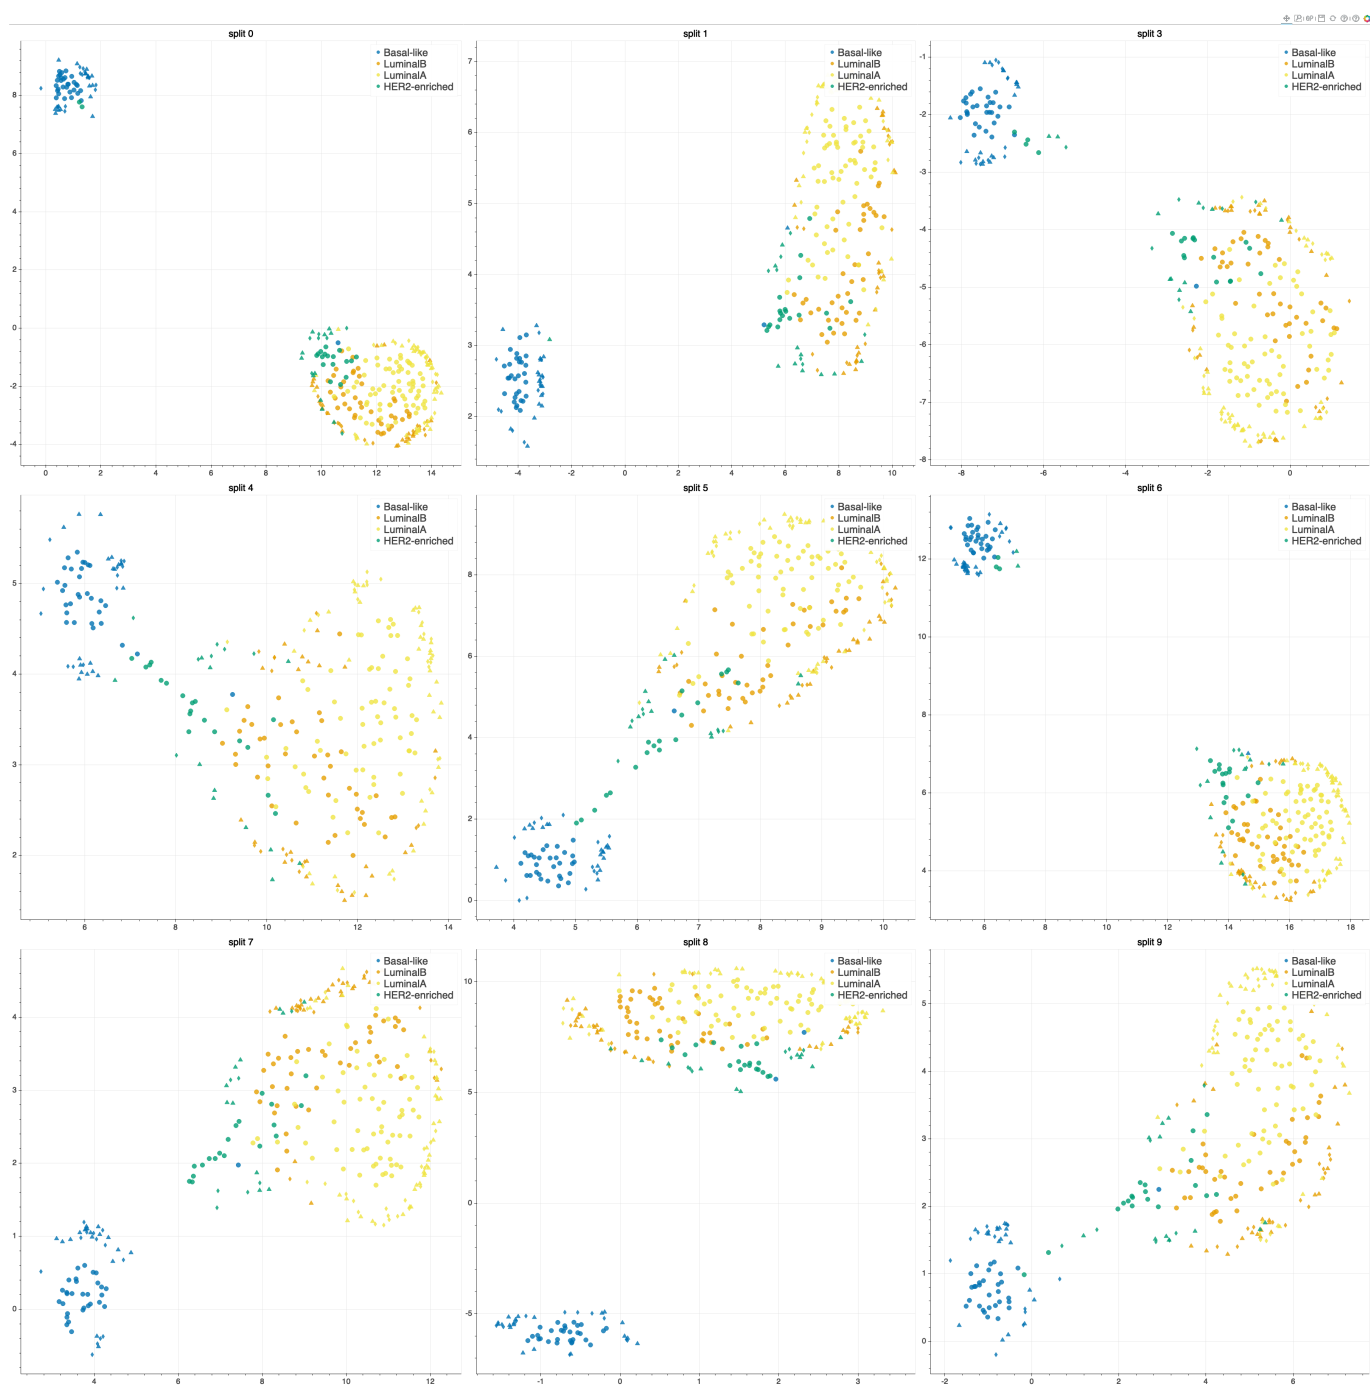

Supplement: Supplementary file [file 23555018]
